# THE AMERICAN JOURNAL OF PSYCHIATRY

TRAUMA AND STRESSOR-RELATED DISORDERS  
BIPOLAR AND RELATED DISORDERS  
FEEDING AND EATING DISORDERS  
DEPRESSIVE DISORDERS  
SLEEP-WAKE DISORDERS  
OTHER DISORDERS  
ANXIETY DISORDERS  
NEURODEVELOPMENTAL DISORDERS  
SOMATIC SYMPTOM AND RELATED DISORDERS  
PERSONALITY DISORDERS  
DISRUPTIVE, IMPULSE-CONTROL, AND CONDUCT DISORDERS  
OBSESSIVE-COMPULSIVE AND RELATED DISORDERS  
NEUROCOGNITIVE DISORDERS  
SCHIZOPHRENIA SPECTRUM AND RELATED PSYCHOTIC DISORDERS  
SUBSTANCE USE AND OTHER ADDICTIVE DISORDERS  
GENDER DYSPHORIA  
PARAPHILIC DISORDERS  
SEXUAL DYSFUNCTIONS  
ELIMINATION DISORDERS

DSM-5 Field Trials in the United States and Canada, Part I: Study Design, Sampling Strategy, Implementation, and Analytic Approaches

Diana E. Clarke, Ph.D., M.Sc., et al. 43

DSM-5 Field Trials in the United States and Canada, Part II: Test-Retest Reliability of Selected Categorical Diagnoses

Darrel A. Regier, M.D., M.P.H., et al. 59

DSM-5 Field Trials in the United States and Canada, Part III: Development and Reliability Testing of a Cross-Cutting Symptom Assessment for DSM-5

William E. Narrow, M.D., M.P.H., et al. 71

Continuing Medical Education 129

January 2013

Volume 170 • Number 1

Official Journal of the  
AMERICAN PSYCHIATRIC ASSOCIATION

[ajp.psychiatryonline.org](http://ajp.psychiatryonline.org)
